# Supplementary material for: Male reproductive aging arises via multifaceted mating-dependent sperm and seminal proteome declines, but is postponable in Drosophila
Source: PubMed Central journal article supplement (PMC7382285; doi:10.1073/pnas.2009053117), 2020-07-01
Supplement: pnas.2009053117.sapp.pdf [file pnas.2009053117.sapp.pdf]

Supplementary Information for

**Male reproductive ageing arises via multifaceted mating-dependent sperm and seminal proteome declines, but is postponable in *Drosophila***

Irem Sepil, Ben R Hopkins, Rebecca Dean, Eleanor Bath, Solomon Friedman, Ben Swanson, Harrison Ostridge, Lucy Harper, Norene A Buehner, Mariana F Wolfner, Rebecca Konietzny, Marie-Laëtitia Thézénas, Elizabeth Sandham, Philip D Charles, Roman Fischer, Josefa Steinhauer, Benedikt M Kessler, Stuart Wigby

Correspondence to: [irem.sepil@zoo.ox.ac.uk](mailto:irem.sepil@zoo.ox.ac.uk)

**This PDF file includes:**

Figs. S1 to S12

Tables S1 to S3

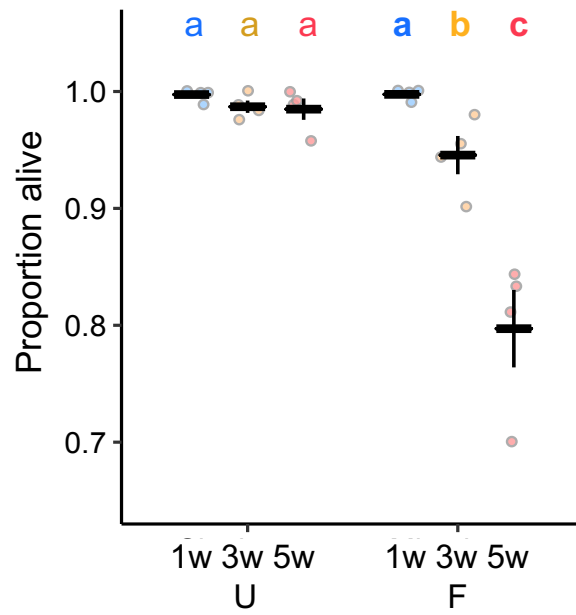

**Fig. S1:** Old-F males are less likely to survive the experiment. Age:  $\chi^2_2= 120.36$ ;  $p < 0.0001$ ; mating:  $\chi^2_1= 92.732$ ;  $p < 0.0001$ ; age and mating interaction:  $\chi^2_2= 6.246$ ;  $p = 0.170$  ( $n = 384 - 444$ , pooled from four replicates). Results are shown as means  $\pm$  SEM. “U” stands for unmated and “F” stands for frequently mated males. Differences at  $p < 0.05$  within mating groups and age categories are represented as different letters.

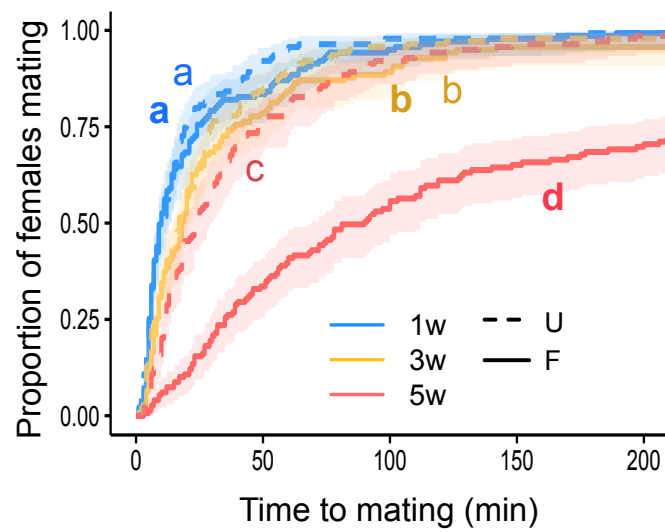

**Fig. S2:** Old males show a significant reduction in copulation probability. Age and mating interaction:  $\chi^2_2 = 55.278$ ;  $p < 0.0001$  ( $n = 139-149$ ). “U” stands for unmated and “F” stands for frequently mated males. Shaded areas are confidence intervals at 0.15 level. Differences at  $p < 0.05$  within mating groups and age categories are represented as different letters.

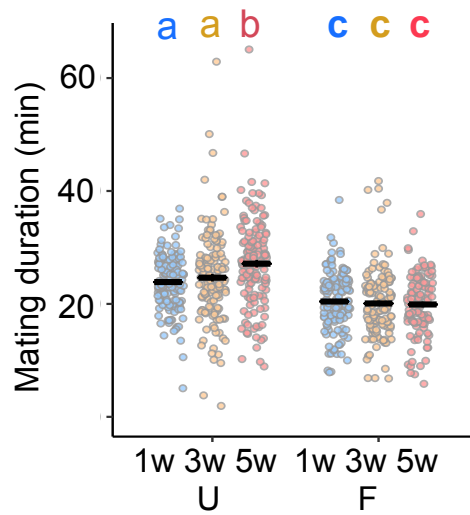

**Fig. S3:** Old-U males show a significant increase in mating duration. Age and mating interaction:  $\chi^2_2 = 6.6462$ ;  $p = 0.001$  ( $n = 113-138$ ). “U” stands for unmated and “F” stands for frequently mated males. Differences at  $p < 0.05$  within mating groups and age categories are represented as different letters.

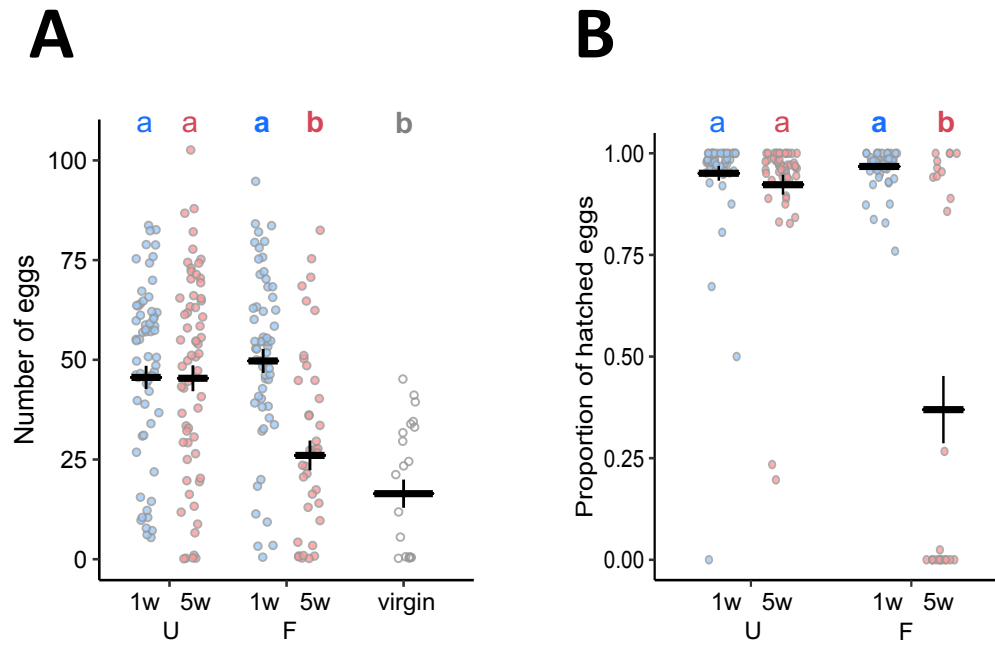

**Fig. S4:** (A) Females mated to Old-F males lay fewer eggs - similar numbers as virgin females (*binomial*: female mating treatment:  $\chi^2_4 = 31.082$ ;  $p < 0.0001$ ; *count*: female mating treatment:  $\chi^2_4 = 334.46$ ;  $p < 0.0001$ ) ( $n = 23-67$ ). (B) The eggs from Old-F matings are less likely to hatch (age and mating interaction:  $\chi^2_1 = 202.26$ ;  $p < 0.0001$ ) ( $n = 32-63$ ). “U” stands for unmated and “F” stands for frequently mated males. Differences at  $p < 0.05$  within treatments are represented as different letters.

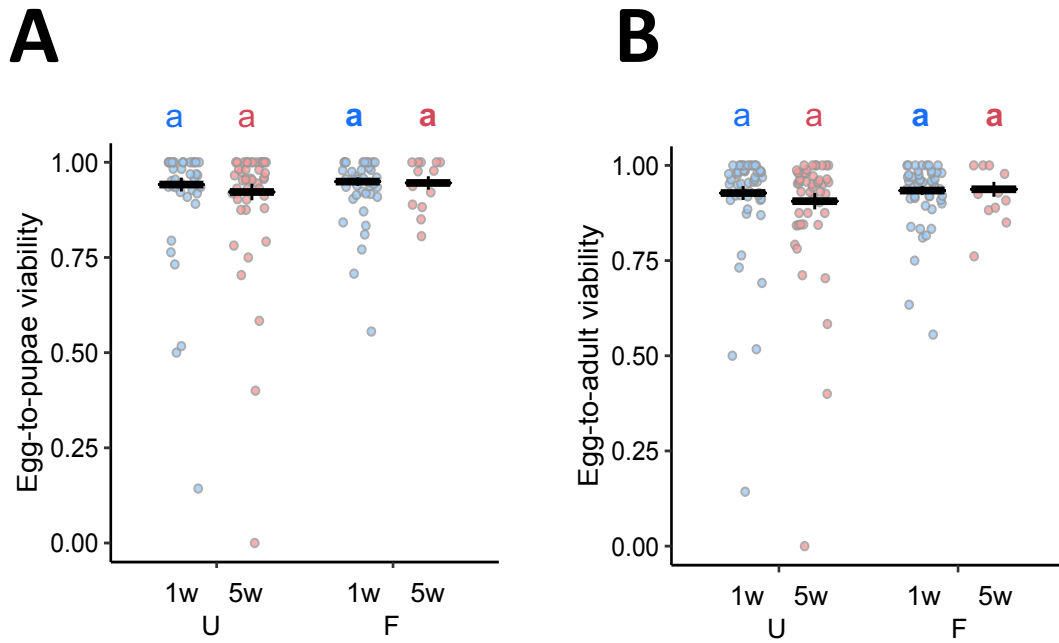

**Fig. S5:** Male age and mating history do not have a significant effect on **(A)** egg-to-pupae viability of hatched eggs (male age:  $\chi^2_1 = 8.822$ ;  $p = 0.284$ ; mating group:  $\chi^2_1 = 1.168$ ;  $p = 0.698$ ; interaction between male age and mating group:  $\chi^2_1 = 0.280$ ;  $p = 0.85$ ) ( $n = 14-62$ ); **(B)** egg-to-adult viability of hatched eggs (male age:  $\chi^2_1 = 7.353$ ;  $p = 0.277$ ; mating group:  $\chi^2_1 = 0.759$ ;  $p = 0.728$ ; interaction between male age and mating group:  $\chi^2_1 = 0.976$ ;  $p = 0.694$ ) ( $n = 14-62$ ). “U” stands for unmated and “F” stands for frequently mated males. Differences at  $p < 0.05$  within mating groups and age categories are represented as different letters.

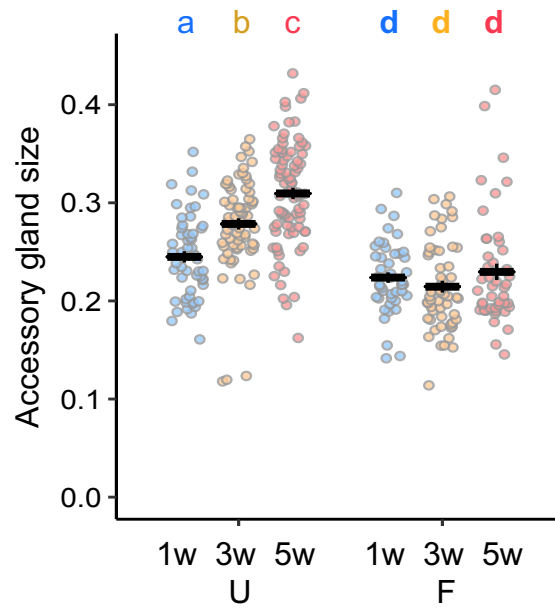

**Fig. S6:** Aging and frequent mating impacts on accessory gland area (mm<sup>2</sup>). Age and mating interaction:  $F^2_2 = 10.685$ ;  $p < 0.0001$  ( $n = 49 - 84$ ). “U” stands for unmated and “F” stands for frequently mated males. Results are shown as means  $\pm$  SEM. Differences at  $p < 0.05$  within mating groups and age categories are represented as different letters.

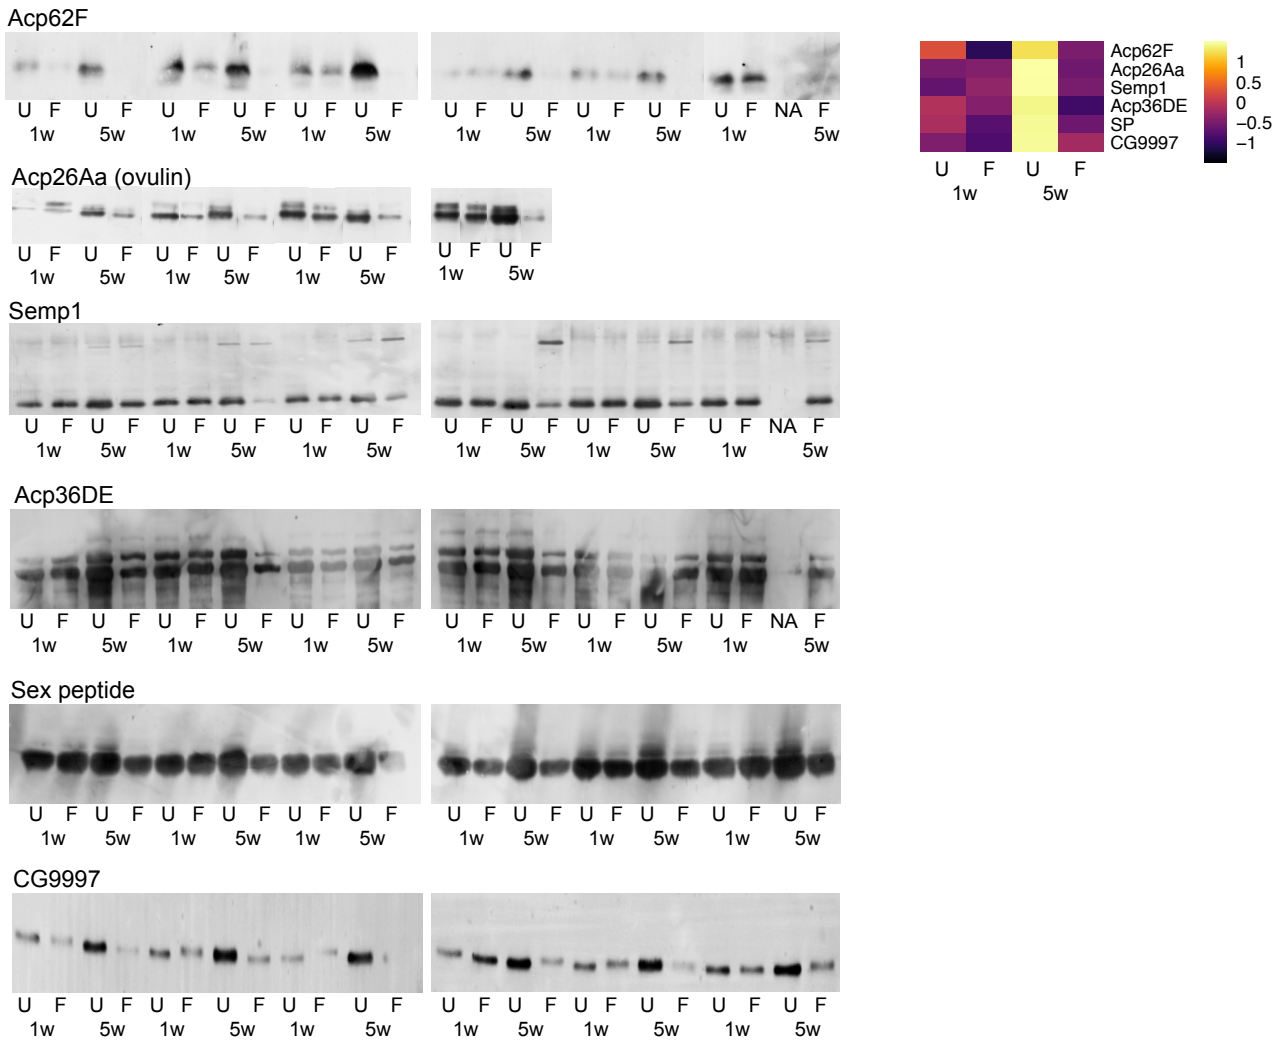

**Fig. S7:** The gel mobility of a number of functionally important Sfps (Acp62F, Acp26Aa, Semp1, Acp36DE, Sex peptide, and CG9997) as determined by Western blots, in 1w and 5w males from U and F groups. The abundance of each protein is predicted from the proteomic data and illustrated as a heatmap. Each lane is an individual male. “U” stands for unmated and “F” stands for frequently mated males.



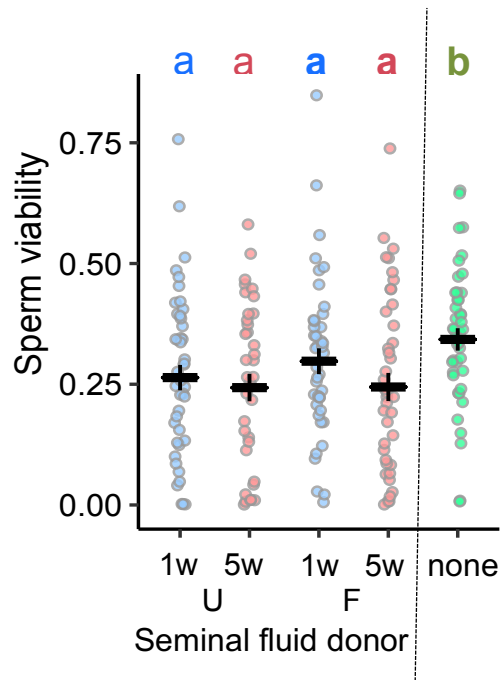

**Fig. S8:** No evidence that sperm viability 1 hour after removal from the seminal vesicles responds to the age and mating status of the male contributing the seminal fluid. Also no evidence that seminal fluid from a different male protects sperm. Donor type:  $\chi^2_4 = 264.96$ ;  $p = 0.013$  ( $n = 38 - 45$ ). “U” stands for unmated and “F” stands for frequently mated males. Results are shown as means  $\pm$  SEM. Differences at  $p < 0.05$  within between treatments are represented as different letters.

| Male status               | Male sperm and seminal fluid stores                                                | Transferred ejaculate                                                              | Fertility                                      | Seminal proteome composition | Seminal stimulation of females                     |
|---------------------------|------------------------------------------------------------------------------------|------------------------------------------------------------------------------------|------------------------------------------------|------------------------------|----------------------------------------------------|
| Young                     | 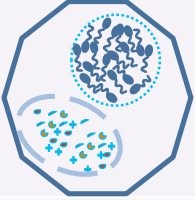  |   | High<br>(standard + competitive)               | Baseline                     | High<br>(fecundity + refractoriness)               |
| Old<br>(Unmated)          |   |   | High<br>(standard)<br><br>Low<br>(competitive) | Altered                      | Low<br>(fecundity)<br><br>High<br>(refractoriness) |
| Old<br>(Frequently mated) |  |  | Low<br>(standard + competitive)                | Baseline                     | Low<br>(fecundity + refractoriness)                |

  



 Seminal fluid proteome     Male ejaculate stores  
 Aberrant proteins     Transferred ejaculate  
 Sperm

**Fig. S9:** Schematic summary of the impacts of ageing on the ejaculate.

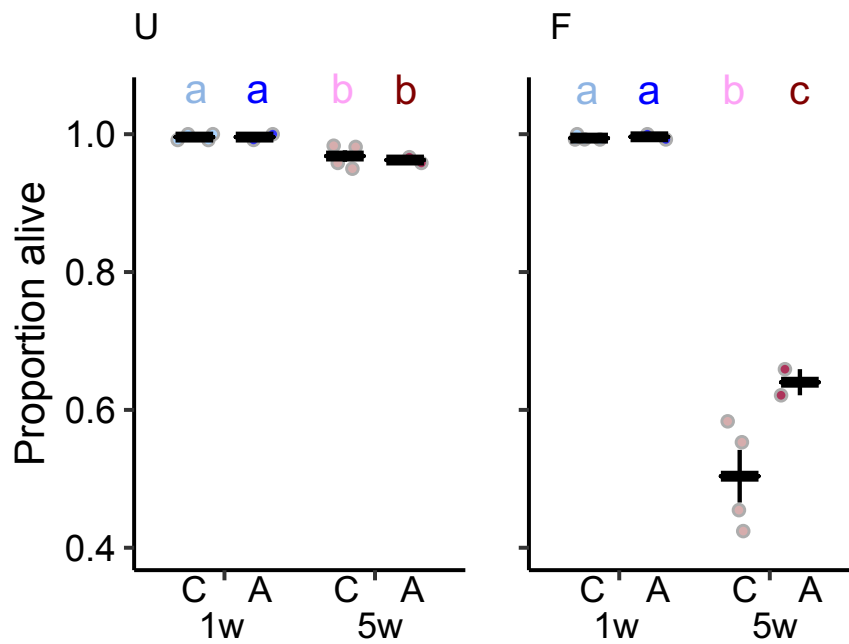

**Fig. S10:** Old-F ablated males (*UAS-rpr* > *InsP3GAL*) are more likely to survive the experiment compared to Old-F control males (*InsP3GAL/+* and *UAS-rpr/+*). *U*: age:  $\chi^2_1 = 19.288$ ;  $p < 0.0001$ ; line:  $\chi^2_1 = 0.124$ ;  $p = 0.692$ ; age and line interaction:  $\chi^2_1 = 0.015$ ;  $p = 0.895$ . *F*: age:  $\chi^2_1 = 556.52$ ;  $p < 0.0001$ ; line:  $\chi^2_1 = 12.648$ ;  $p = 0.005$ ; age and line interaction:  $\chi^2_1 = 0.013$ ;  $p = 0.932$  (n= 228 - 528, pooled from two replicates). “C” stands for control and “A” stands for ablated lines. “U” stands for unmated and “F” stands for frequently mated males. Results are shown as means  $\pm$  SEM. Differences at  $p < 0.05$  within lines and age categories are represented as different letters.

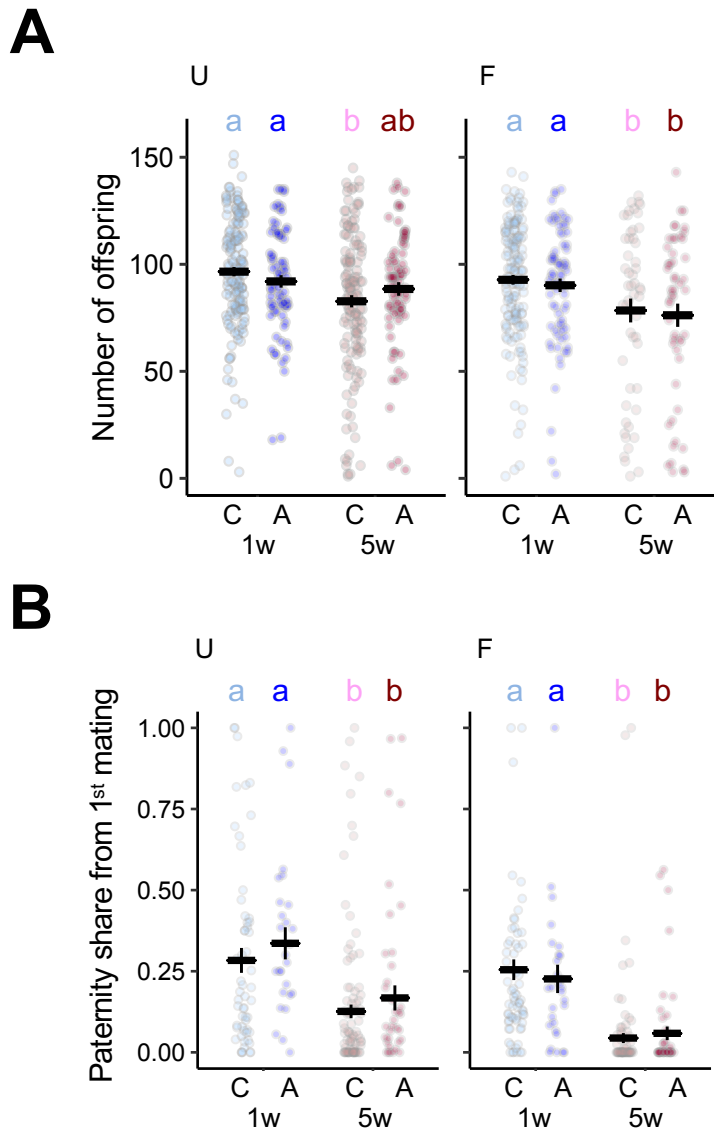

**Fig. S11:** No evidence of differential offspring production and paternity share between ablated (*UAS-rpr > InsP3GAL*) and control (*InsP3GAL/+* and *UAS-rpr/+*) males as a response to age and mating status. **(A)** Offspring production (*U*: age:  $\chi^2_1=133.4$ ;  $p < 0.0001$ ; line:  $\chi^2_1=0.028$ ;  $p = 0.953$ ; age and line interaction:  $\chi^2_1=26.518$ ;  $p = 0.0681$ ) (*F*: age:  $\chi^2_1=297.53$ ;  $p < 0.0001$ ; line:  $\chi^2_1=0.102$ ;  $p = 0.923$ ; age and line interaction:  $\chi^2_1=3.042$ ;  $p = 0.6$ ) ( $n = 51 - 153$  pooled from three replicates). **(B)** Paternity share (*U*: age:  $\chi^2_1=681.12$ ;  $p < 0.0001$ ; line:  $\chi^2_1=2.582$ ;  $p = 0.77$ ; age and line interaction:  $\chi^2_1=39.15$ ;  $p = 0.256$ ) (*F*: age:  $\chi^2_1=1792$ ;  $p < 0.0001$ ; line:  $\chi^2_1=0.008$ ;  $p = 0.986$ ; age and line interaction:  $\chi^2_1=22.254$ ;  $p = 0.365$ ) ( $n = 30 - 112$  pooled from three replicates). “C” stands for control and “A” stands for ablated lines. “U” stands for unmated and “F” stands for frequently mated males. Results are shown as means  $\pm$  SEM. Differences at  $p < 0.05$  within fly lines and age categories are represented as different letters.

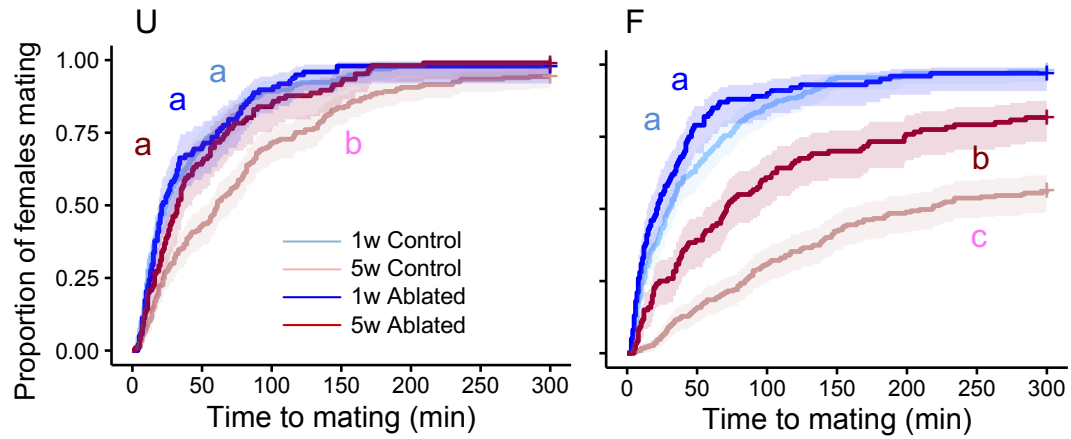

**Fig. S12:** Females are more likely to mate with Old-F ablated males (*UAS-rpr* > *InsP3GAL*) compared to Old-F control males (*InsP3GAL/+* and *UAS-rpr/+*). *U*: age and line interaction:  $\chi^2_1 = 7.447$ ;  $p = 0.006$  ( $n = 98-213$ ). *F*: age and line interaction:  $\chi^2_1 = 5.472$ ;  $p = 0.019$  ( $n = 100-227$ ). “U” stands for unmated and “F” stands for frequently mated males. Shaded areas are confidence intervals at 0.15 level. Differences at  $p < 0.05$  within mating groups and age categories are represented as different letters.

**Table S1:** The list of Sfps detected in this study and their functional categories. The abundance of 40 Sfps show a significant differential response to age and mating after false discovery rate (FDR) correction (*Age x Mating qval*) and have been listed in the order of significance. Each Sfps individual response to age and mating after FDR correction are also included (*Age qval* and *Mating qval* respectively).

| <i>Protein</i> | <i>Age qval</i> | <i>Mating qval</i> | <i>Age x Mating qval</i> | <i>Functional Category</i> |
|----------------|-----------------|--------------------|--------------------------|----------------------------|
| CG3097         | 0.001939        | 0.000001           | 0.0007                   | Protease                   |
| CG10587        | 0.000328        | 0.000005           | 0.0010                   | Protease                   |
| regucalcin     | 0.002151        | 0.000001           | 0.0010                   | Calcium ion binding        |
| CG31413        | 0.006683        | 0.000010           | 0.0014                   | Cell redox homeostasis     |
| Sfp65A         | 0.000127        | 0.000006           | 0.0014                   | Unknown function           |
| mfas           | 0.000000        | 0.000002           | 0.0015                   | Cell adhesion              |
| Spn42Dd        | 0.000267        | 0.000001           | 0.0015                   | Protease inhibitor         |
| CG31659        | 0.000025        | 0.000001           | 0.0028                   | Lipid metabolism           |
| CG34002        | 0.000215        | 0.000024           | 0.0029                   | Unknown function           |
| CG17093        | 0.005077        | 0.000004           | 0.0031                   | Lipid metabolism           |
| CG17097        | 0.007977        | 0.000009           | 0.0031                   | Lipid metabolism           |
| CG34051        | 0.000731        | 0.003108           | 0.0031                   | Unknown function           |
| Semp1          | 0.003534        | 0.001941           | 0.0031                   | Protease                   |
| CG31883        | 0.215710        | 0.000001           | 0.0040                   | Unknown function           |
| Sems           | 0.002151        | 0.000020           | 0.0040                   | Post-mating behaviour      |
| SP             | 0.000328        | 0.000001           | 0.0040                   | Post-mating behaviour      |
| lectin-46Ca    | 0.002152        | 0.000123           | 0.0045                   | Post-mating behaviour      |
| Sfp24F         | 0.001384        | 0.000143           | 0.0048                   | Carbohydrate interactions  |
| CG34130-RA     | 0.000122        | 0.000001           | 0.0060                   | Protease                   |
| Acp26Ab        | 0.001849        | 0.000076           | 0.0098                   | Post-mating behaviour      |
| CG31418        | 0.004048        | 0.000004           | 0.0098                   | Unknown function           |
| CG34129        | 0.008755        | 0.000010           | 0.0098                   | Protease                   |
| CG3640         | 0.000267        | 0.000008           | 0.0098                   | Unknown function           |
| CG11608        | 0.032160        | 0.001008           | 0.0114                   | Lipid metabolism           |
| Acp26Aa        | 0.012934        | 0.000495           | 0.0122                   | Post-mating behaviour      |
| CG10284        | 0.000132        | 0.000008           | 0.0122                   | Defense/immunity           |
| Acp53Ea        | 0.000328        | 0.000048           | 0.0127                   | Post-mating behaviour      |
| lectin-29Ca    | 0.001661        | 0.000003           | 0.0129                   | Carbohydrate interactions  |
| Spn28F         | 0.007086        | 0.000012           | 0.0129                   | Protease inhibitor         |
| CG31419        | 0.001849        | 0.000004           | 0.0135                   | Unknown function           |
| CG31680        | 0.000063        | 0.000003           | 0.0176                   | Unknown function           |
| aqrs           | 0.001384        | 0.000002           | 0.0188                   | Post-mating behaviour      |
| Obp56i         | 0.000671        | 0.000000           | 0.0214                   | Odorant binding            |
| NUCB1          | 0.000024        | 0.000819           | 0.0220                   | Defense/immunity           |
| CG17472        | 0.000711        | 0.025065           | 0.0251                   | Unknown function           |
| CG17843        | 0.000671        | 0.000006           | 0.0259                   | Cell redox homeostasis     |
| Sfp38D         | 0.001849        | 0.000008           | 0.0279                   | Unknown function           |
| CG17575        | 0.574146        | 0.042919           | 0.0328                   | Post-mating behaviour      |
| CG17919        | 0.025211        | 0.011913           | 0.0328                   | Defense/immunity           |

|             |          |          |        |                           |
|-------------|----------|----------|--------|---------------------------|
| CG9997      | 0.000267 | 0.000029 | 0.0344 | Post-mating behaviour     |
| CG4847      | 0.014889 | 0.000161 | 0.0539 | Protease                  |
| CG9168      | 0.011594 | 0.023971 | 0.0539 | Catalytic activity        |
| CG9519      | 0.011649 | 0.176250 | 0.0539 | Cell redox homeostasis    |
| Est-6       | 0.024980 | 0.595285 | 0.0539 | Post-mating behaviour     |
| CG10651     | 0.010840 | 0.011092 | 0.0565 | Unknown function          |
| CG17242     | 0.003266 | 0.022477 | 0.0565 | Protease                  |
| Hexo2       | 0.001661 | 0.000002 | 0.0565 | Carbohydrate interactions |
| Spn38F      | 0.079187 | 0.011565 | 0.0565 | Defense/immunity          |
| Spn75F      | 0.012124 | 0.004355 | 0.0583 | Protease inhibitor        |
| CG10730     | 0.493557 | 0.083393 | 0.0587 | Catalytic activity        |
| Acp36DE     | 0.270410 | 0.000243 | 0.0655 | Post-mating behaviour     |
| CG18284     | 0.000215 | 0.009889 | 0.0718 | Lipid metabolism          |
| lectin-30A  | 0.120793 | 0.000010 | 0.0718 | Carbohydrate interactions |
| Acp53C14a   | 0.029885 | 0.000028 | 0.0725 | Unknown function          |
| CG11598     | 0.294351 | 0.006846 | 0.0725 | Lipid metabolism          |
| CG15116     | 0.015728 | 0.369419 | 0.0725 | Cell redox homeostasis    |
| CG15117     | 0.014297 | 0.000005 | 0.0725 | Carbohydrate interactions |
| CG30395     | 0.855762 | 0.001899 | 0.0725 | Unknown function          |
| CG31684     | 0.071129 | 0.001050 | 0.0725 | Lipid metabolism          |
| lectin-46Cb | 0.002413 | 0.000737 | 0.0725 | Post-mating behaviour     |
| Obp56g      | 0.138601 | 0.017418 | 0.0747 | Odorant binding           |
| CG1701      | 0.085978 | 0.054908 | 0.0821 | Unknown function          |
| CG9029      | 0.047172 | 0.095215 | 0.0839 | Defense/immunity          |
| betaTub85D  | 0.645682 | 0.042919 | 0.0862 | DNA interactions          |
| antr        | 0.002805 | 0.000010 | 0.1017 | Post-mating behaviour     |
| BG642312    | 0.372316 | 0.001851 | 0.1075 | Post-mating behaviour     |
| Spn28B      | 0.008040 | 0.000039 | 0.1075 | Protease inhibitor        |
| Sfp78E      | 0.077672 | 0.006576 | 0.1163 | Unknown function          |
| CG14034     | 0.048468 | 0.000031 | 0.1209 | Lipid metabolism          |
| CG2852      | 0.590456 | 0.004743 | 0.1209 | Catalytic activity        |
| NLaz        | 0.008446 | 0.023971 | 0.1379 | Lipid metabolism          |
| Acp53C14c   | 0.398788 | 0.000306 | 0.1536 | Unknown function          |
| Sfp23F      | 0.086745 | 0.002687 | 0.1536 | Protease inhibitor        |
| Spn77Bb     | 0.398788 | 0.776094 | 0.1548 | Protease inhibitor        |
| Obp22a      | 0.000731 | 0.000123 | 0.1622 | Odorant binding           |
| Sfp26Ad     | 0.016149 | 0.000474 | 0.1629 | Unknown function          |
| Acp76A      | 0.333139 | 0.069725 | 0.1715 | Protease inhibitor        |
| CG6071      | 0.147006 | 0.685423 | 0.1715 | Protease                  |
| Ggt-1       | 0.138347 | 0.000160 | 0.1715 | Protease                  |
| CG6690      | 0.045501 | 0.000517 | 0.1849 | Cell redox homeostasis    |
| Spn28Db     | 0.148625 | 0.000006 | 0.1986 | Protease inhibitor        |
| CG18067     | 0.000267 | 0.445143 | 0.2091 | Unknown function          |
| Phm         | 0.185761 | 0.095019 | 0.2143 | Catalytic activity        |
| CG10041     | 0.924033 | 0.011473 | 0.2274 | Protease                  |
| CG10407     | 0.424137 | 0.007841 | 0.2274 | Unknown function          |
| Acp29AB     | 0.382685 | 0.000335 | 0.2289 | Post-mating behaviour     |

|             |          |          |        |                               |
|-------------|----------|----------|--------|-------------------------------|
| CG18135     | 0.415179 | 0.559060 | 0.2989 | Lipid metabolism              |
| CG5162      | 0.012421 | 0.040758 | 0.3634 | Lipid metabolism              |
| Sfp51E      | 0.006425 | 0.000393 | 0.3674 | Unknown function              |
| Sfp33A3     | 0.020628 | 0.004146 | 0.3882 | Catalytic activity inhibition |
| Obp56f      | 0.097002 | 0.006955 | 0.4605 | Odorant binding               |
| S-Lap7      | 0.187481 | 0.182767 | 0.5183 | Protease                      |
| CG15641     | 0.012124 | 0.000790 | 0.5300 | Unknown function              |
| CG34034     | 0.859900 | 0.391358 | 0.5323 | Unknown function              |
| Sfp24C1     | 0.014889 | 0.012834 | 0.5323 | Protease inhibitor            |
| Mst57Dc     | 0.031189 | 0.000158 | 0.5393 | Post-mating behaviour         |
| BG642163    | 0.128093 | 0.012834 | 0.5524 | Unknown function              |
| Obp51a      | 0.464016 | 0.445143 | 0.5642 | Odorant binding               |
| alphaTub84B | 0.001972 | 0.153894 | 0.6126 | DNA interactions              |
| CG11112     | 0.070414 | 0.004466 | 0.6126 | Unknown function              |
| Dup99B      | 0.038606 | 0.332900 | 0.6126 | Post-mating behaviour         |
| CG32833     | 0.016324 | 0.001256 | 0.6511 | Protease                      |
| Spn77Bc     | 0.103226 | 0.026241 | 0.6905 | Protease inhibitor            |
| Sfp70A4     | 0.294351 | 0.066354 | 0.6974 | Unknown function              |
| CG11037     | 0.030346 | 0.000847 | 0.7095 | Protease                      |
| CG30486     | 0.294351 | 0.006955 | 0.7620 | Unknown function              |
| CG31515     | 0.168643 | 0.022477 | 0.7620 | Protease inhibitor            |
| Met75Ca     | 0.487535 | 0.327324 | 0.7753 | Unknown function              |
| Sfp35C      | 0.110603 | 0.003618 | 0.8377 | Unknown function              |
| Npc2b       | 0.011594 | 0.332306 | 0.8645 | Hormone metabolism            |
| Acp62F      | 0.364605 | 0.004466 | 0.8903 | Post-mating behaviour         |
| CG15635     | 0.590456 | 0.370730 | 0.9536 | Unknown function              |
| Acp53C14b   | 0.193640 | 0.019589 | 0.9736 | Unknown function              |
| CG31704     | 0.528657 | 0.018633 | 0.9736 | Unknown function              |
| CG34033     | 0.028763 | 0.000847 | 0.9736 | Unknown function              |
| Obp56e      | 0.814145 | 0.000635 | 0.9741 | Odorant binding               |
| CG43145     | 0.291021 | 0.008410 | 0.9763 | Protease inhibitor            |



**Table S2:** The list of ejaculatory-duct specific Sfps detected in this study and their functional categories. The top eight ejaculatory-duct specific Sfps clustered separately from the rest of the Sfps. Each Sfps individual response to age, mating and their interaction after FDR correction are also included (*Age qval*, *Mating qval* and *Age x Mating qval* respectively).

| <i>Protein</i> | <i>Cluster</i> | <i>Age qval</i> | <i>Mating qval</i> | <i>Age x Mating qval</i> | <i>Functional Category</i> |
|----------------|----------------|-----------------|--------------------|--------------------------|----------------------------|
| CG34034        | Yes            | 0.860           | 0.391              | 0.532                    | Unknown function           |
| Obp51a         | Yes            | 0.464           | 0.445              | 0.564                    | Odorant binding            |
| Met75Ca        | Yes            | 0.488           | 0.327              | 0.775                    | Unknown function           |
| Spn77Bc        | Yes            | 0.103           | 0.026              | 0.691                    | Protease inhibitor         |
| Est-6          | Yes            | 0.025           | 0.595              | 0.054                    | Post-mating behaviour      |
| Dup99B         | Yes            | 0.039           | 0.333              | 0.613                    | Post-mating behaviour      |
| CG5162         | Yes            | 0.012           | 0.041              | 0.363                    | Lipid metabolism           |
| CG17242        | Yes            | 0.003           | 0.022              | 0.057                    | Protease                   |
| Obp56g         | No             | 0.139           | 0.017              | 0.075                    | Odorant binding            |
| CG18067        | No             | 0.000           | 0.445              | 0.209                    | Unknown function           |
| Spn77Bb        | No             | 0.399           | 0.776              | 0.155                    | Protease inhibitor         |
| CG31704        | No             | 0.529           | 0.019              | 0.974                    | Unknown function           |
| NLaz           | No             | 0.008           | 0.024              | 0.138                    | Lipid metabolism           |

**Table S3:** Pairwise comparisons between the two control genotypes (*InsP3GAL/+* and *UAS-rpr/+*) within each age and mating treatment. These are 1w and 5w old U and F treatments. The response variables are the proportion of infertile matings, female latency to remating, the proportion of flies to survive the experiment, offspring production, paternity share of the first male and female latency to mating. “U” stands for unmated and “F” stands for frequently mated males. Differences at  $p < 0.05$  are given in red.

| <i>Effect</i>     | <i>Treatment</i> | <i>Estimate</i> | <i>Standard error</i> | <i>T value</i> | <i>P value</i> |
|-------------------|------------------|-----------------|-----------------------|----------------|----------------|
| Infertile matings | 1wU              | -0.874          | 0.761                 | -1.147         | 0.251          |
|                   | 5wU              | -0.104          | 0.353                 | -0.293         | 0.769          |
|                   | 1wF              | -1.066          | 0.891                 | -1.196         | 0.232          |
|                   | 5wF              | 0.855           | 0.445                 | 1.921          | 0.055          |
| Remating latency  | 1wU              | 0.475           | 0.228                 | 2.080          | <b>0.037</b>   |
|                   | 5wU              | 0.589           | 0.248                 | 2.380          | <b>0.018</b>   |
|                   | 1wF              | 0.176           | 0.181                 | 0.970          | 0.333          |
|                   | 5wF              | -0.415          | 0.253                 | -1.640         | 0.101          |
| Proportion alive  | 1wU              | -1.149E-15      | 3.890e-05             | 0              | 1              |
|                   | 5wU              | 0.993           | 0.149                 | 6.650          | 0.095          |
|                   | 1wF              | -0.697          | 1.065                 | -0.655         | 0.631          |
|                   | 5wF              | -0.551          | 0.090                 | -6.107         | 0.103          |
| Offspring number  | 1wU              | -0.030          | 0.040                 | -0.740         | 0.460          |
|                   | 5wU              | -0.079          | 0.064                 | -1.238         | 0.218          |
|                   | 1wF              | -0.001          | 0.045                 | -0.011         | 0.991          |
|                   | 5wF              | -0.286          | 0.160                 | -1.785         | 0.081          |
| Paternity share   | 1wU              | 0.529           | 0.457                 | 1.158          | 0.252          |
|                   | 5wU              | 0.201           | 0.368                 | 0.546          | 0.586          |
|                   | 1wF              | -0.112          | 0.294                 | -0.381         | 0.704          |
|                   | 5wF              | -2.660          | 1.151                 | -2.312         | <b>0.023</b>   |
| Mating latency    | 1wU              | -0.388          | 0.153                 | -2.540         | <b>0.011</b>   |
|                   | 5wU              | 0.224           | 0.136                 | 1.640          | 0.101          |
|                   | 1wF              | 0.042           | 0.150                 | 0.280          | 0.778          |
|                   | 5wF              | 0.005           | 0.173                 | 0.030          | 0.976          |
